# Supplementary material
Source: PubMed Central journal article supplement (PMC4892125)
Supplement: NIHMS128642-supplement-01.pdf [file NIHMS128642-supplement-01.pdf]

## Supplementary Figure 1

**A**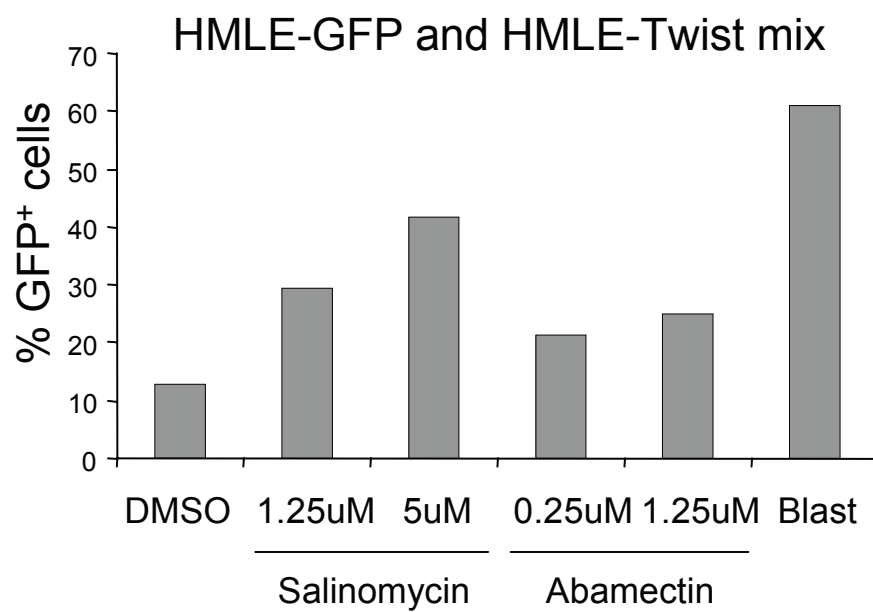**B**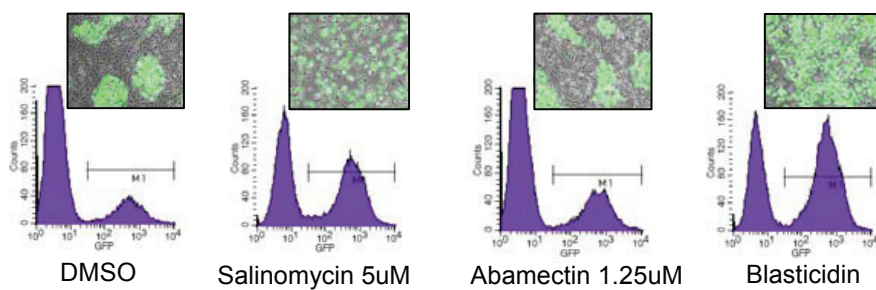

## Supplementary Figure 2

**A**

| Cell line  | CD44 <sup>+</sup> CD24 <sup>-</sup> |
|------------|-------------------------------------|
| SUM159     | 92.6 %                              |
| MDA-MB-231 | 89.9%                               |
| T47D       | 0%                                  |

**B**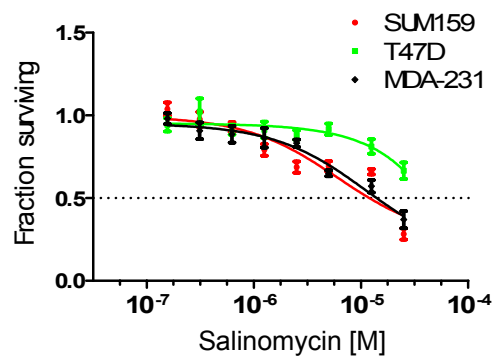

# Supplementary Figure 3

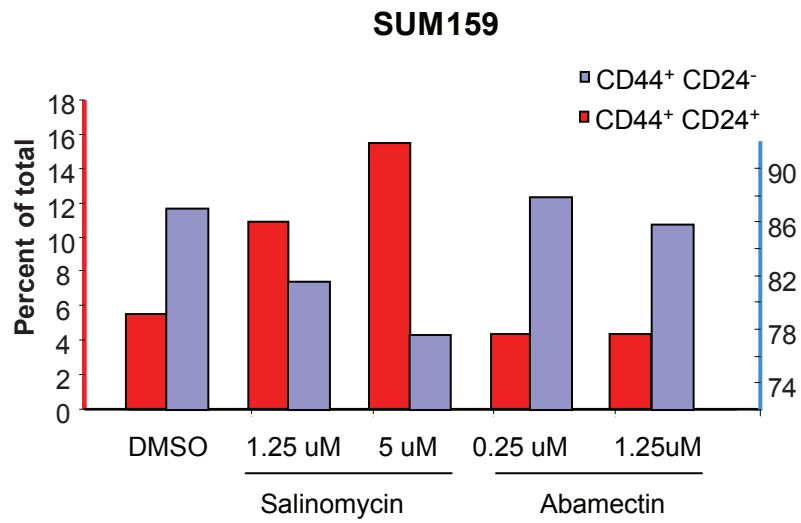

## Supplementary Figure 4

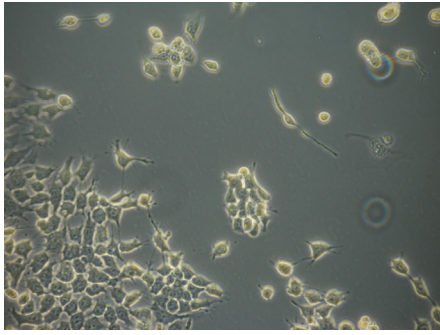

DMSO

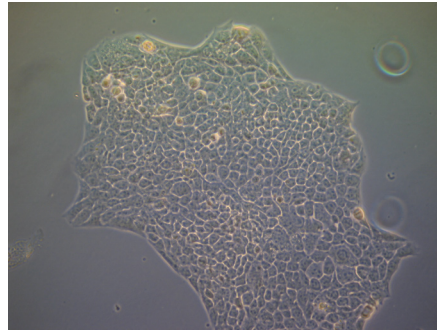

Salinomycin (8uM)

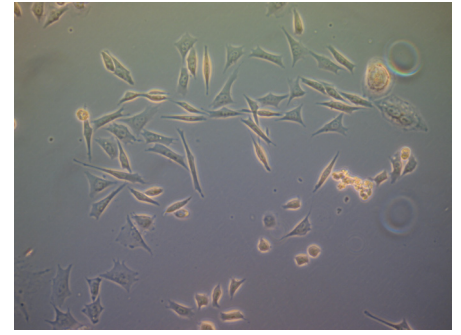

Paclitaxel (20nM)

## Supplementary Figure 5

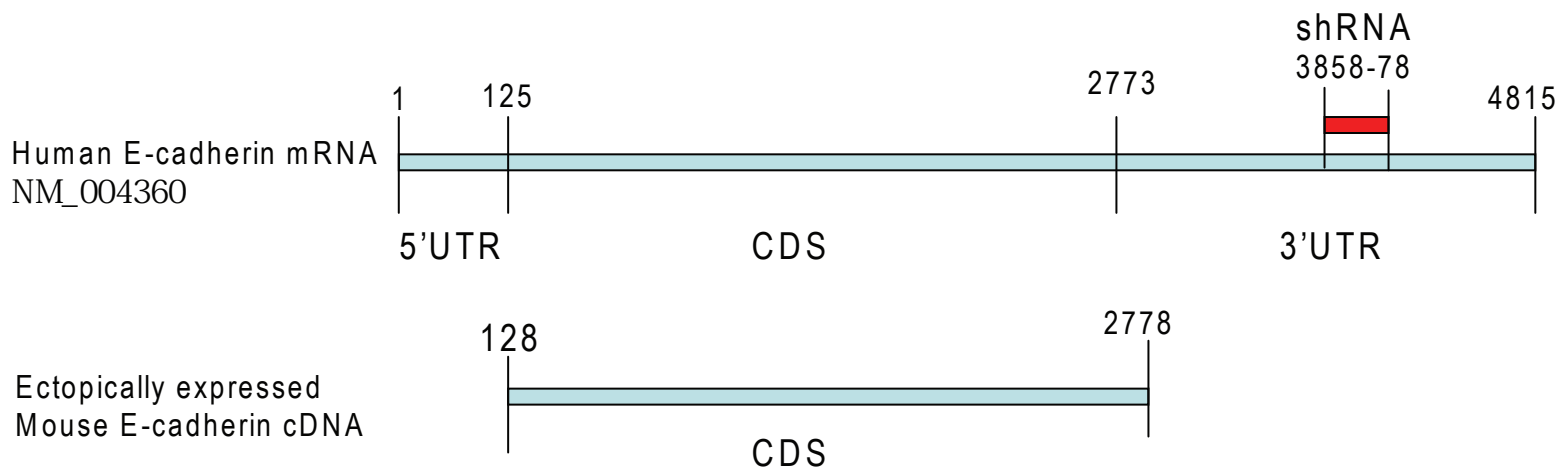

shRNA target sequence: GCAGAAATTATTGGGCTCTTT

## Supplementary Table 1

| CLARKE<br>IGS<br>UP | CLARKE<br>IGS<br>DOWN | POLYAK<br>CD44vsCD24<br>UP | POLYAK<br>CD44vsCD24<br>DOWN | DONTU<br>Mammosphere<br>UP | DONTU<br>Mammosphere<br>DOWN |
|---------------------|-----------------------|----------------------------|------------------------------|----------------------------|------------------------------|
| KIAA0436            | SNRPN                 | ANXA5                      | ABHD5                        | EMP3                       | MET                          |
| AMMECR1             | SCGN                  | ACTG1                      | ADNP                         | GPC4                       | FZD6                         |
| NOL8                | NDEL1                 | ARF3                       | ATP6AP1                      | FZD2                       | FLRT2                        |
| DPF2                | VIL2                  | ATP1B3                     | BATF                         | GHR                        | GATA3                        |
| DKFZP564K0822       | LARS                  | BAT3                       | BTG1                         | IGF2R                      | ELF3                         |
| PLP2                | TOB2                  | CALD1                      | BTG2                         | NOTCH3                     | PTTG1                        |
| MAPK14              | NPD014                | CENTD2                     | CC2D1A                       | FGFR1                      | PTHLH                        |
| HS2ST1              | SWAP70                | CLIC1                      | CLTC                         | PDGFBR                     | STK17A                       |
| KDEL3               | GTPBP1                | CTBS                       | DIMT1L                       | ABC1                       | SIRS1                        |
| PDE8A               | PILRB                 | DPYSL3                     | ELOVL5                       | AEBP1                      | SFRP1                        |
| KIAA1287            | APLP2                 | DVL3                       | IRF1                         | GAS6                       | EVA1                         |
| LOC144233           | TPD52                 | EXT1                       | LTA4H                        | WIG1                       | DSG2                         |
| ISGF3G              | KLF10                 | FGFR1                      | PACAP                        | SCYA2                      | DSG3                         |
| AGPS                | PRSS16                | FTL                        | PLXNA3                       | GPNMB                      | DSC2                         |
| C6orf107            | C5orf18               | GNB2L1                     | RMND5B                       | IGFBP4                     | DSC3                         |
| LOC286505           | DKFZP564D172          | GPRC5A                     | SNX5                         | IGFBP7                     | CDKN3                        |
| GNPDA1              | FAM53C                | H2AFZ                      | TBC1D8                       | SCGF                       |                              |
| PNAS-4              | IER5                  | HIF1A                      |                              | RARRES                     |                              |
| ETTL2 /// FLJ1276   | DUSP10                | IL13RA1                    |                              | GAP43                      |                              |
| FLJ11752            | MGC4399               | KDEL2                      |                              | FYN                        |                              |
| STK39               | CYP4V2                | LARP1                      |                              | WASPIP                     |                              |
| SCNM1               | CITED4                | LPIN2                      |                              | PKD2                       |                              |
| HSPC163             | WFDC2                 | MARS                       |                              | OSF2                       |                              |
| FLJ20530            | HSPA2                 | MMP10                      |                              | HXB                        |                              |
| THUMPD3             | CD59                  | MMP14                      |                              | NID                        |                              |
| MGC45564            | AIM1                  | MT2A                       |                              | NID2                       |                              |
| JTV1                | LOC80298              | MYO10                      |                              | CCND2                      |                              |
| NUP37               | LOC255783             | NUP62                      |                              | TIMP3                      |                              |
| NUDT5               | KIAA0146              | PFKFB3                     |                              | ADAM12                     |                              |
| ALG2                | CDW92                 | PLOD2                      |                              | PTOV1                      |                              |
| CSTF1               | KIAA0792              | PSMB7                      |                              | DCN                        |                              |
| NSF                 | LOC439994             | PSMD8                      |                              |                            |                              |
| ATXN3               | MLF1                  | RIN2                       |                              |                            |                              |
| KIAA0276            | PBP                   | RYBP                       |                              |                            |                              |
| CAP350              | DHRS6                 | SDF4                       |                              |                            |                              |
| ETAA16              | ELL2                  | SETD5                      |                              |                            |                              |
| SNARK               | ARGBP2                | SPP1                       |                              |                            |                              |
| KLHL20              | ZBTB20                | STAU1                      |                              |                            |                              |
| THEM2               | DKFZP586A0522         | TUBB3                      |                              |                            |                              |
| CASP8               | FLNB                  | UBE2S                      |                              |                            |                              |
| NUCKS               | DHRS4                 | XPNPEP1                    |                              |                            |                              |
| HAN11               | MGC15429              |                            |                              |                            |                              |
| FLJ12806            | HNMT                  |                            |                              |                            |                              |
| DBR1                | IRX3                  |                            |                              |                            |                              |
| RAD23B              | DKFZP564I0422         |                            |                              |                            |                              |
| CNOT4               | ERN1                  |                            |                              |                            |                              |
| STAM                | DNAJB1                |                            |                              |                            |                              |
| PAK2                | ETNK1                 |                            |                              |                            |                              |

|               |           |
|---------------|-----------|
| EIF4E2        | TMC4      |
| ARPC5         | MGC45840  |
| CSNK2A1       | LOC283481 |
| DNAJC13       | LOC388279 |
| DNAPTP6       | NEBL      |
| FLJ12439      | CG018     |
| TICAM2        | SGKL      |
| FLJ90709      | ETS1      |
| C9orf64       | CEBPD     |
| ICMT          | WEE1      |
| TUBB          | ERBB4     |
| FLJ10774      | EMP1      |
| C16orf33      | MMP7      |
| SNX6          | SERTAD1   |
| XPR1          | SLC25A25  |
| RAB23         | CIRBP     |
| C10orf9       | SH3BGRL   |
| KIAA1600      | ECHDC2    |
| C21orf86      | MGC4251   |
| FLJ37953      | LOC130576 |
| C7orf25       | NGFRAP1L1 |
| CLTC          | MAST4     |
| PGK1          | BCL2      |
| COPB2         | MAPT      |
| C10orf7       | B7-H4     |
| RNF8          | CHPT1     |
| PLAA          | ZDHHC2    |
| AFURS1        | MAFF      |
| KIAA0052      | FLJ39370  |
| GAPD          | KIAA1217  |
| FLJ10587      | LRPAP1    |
| DNMT3A        | GOLGIN-67 |
| DKFZP566D1346 | CXCL2     |
| C7orf36       | SFPQ      |
| C7orf2        | LRP2      |
| DCBLD1        | GABARAPL1 |
| FLJ13456      | MGP       |
| FLJ31795      | LTF       |
| LDHA          | C4orf7    |
| SSR1          | STC2      |
| PSMA5         |           |
| SRP54         |           |
| ELP4          |           |
| ATIC          |           |
| GTF3C3        |           |
| NCE2          |           |
| GSK3B         |           |
| MR-1          |           |
| ALKBH         |           |
